# Supplementary material
Source: PubMed Central journal article supplement (PMC5867181)
Supplement: HESR-53-1042-s002.pdf [file HESR-53-1042-s002.pdf]

## APPENDICES

**Table A1: Items from the All-Employees Survey Used to Measure Relational Climate**

|                                                                            |
|----------------------------------------------------------------------------|
| 1) A spirit of cooperation and teamwork exists in my groups                |
| 2) Disputes or conflicts are resolved fairly in my work group              |
| 3) Differences among individuals are respected and valued in my work group |

**Figure A1: Sample Size Evolution to Build Relational Climate based on the All-Employees Survey**

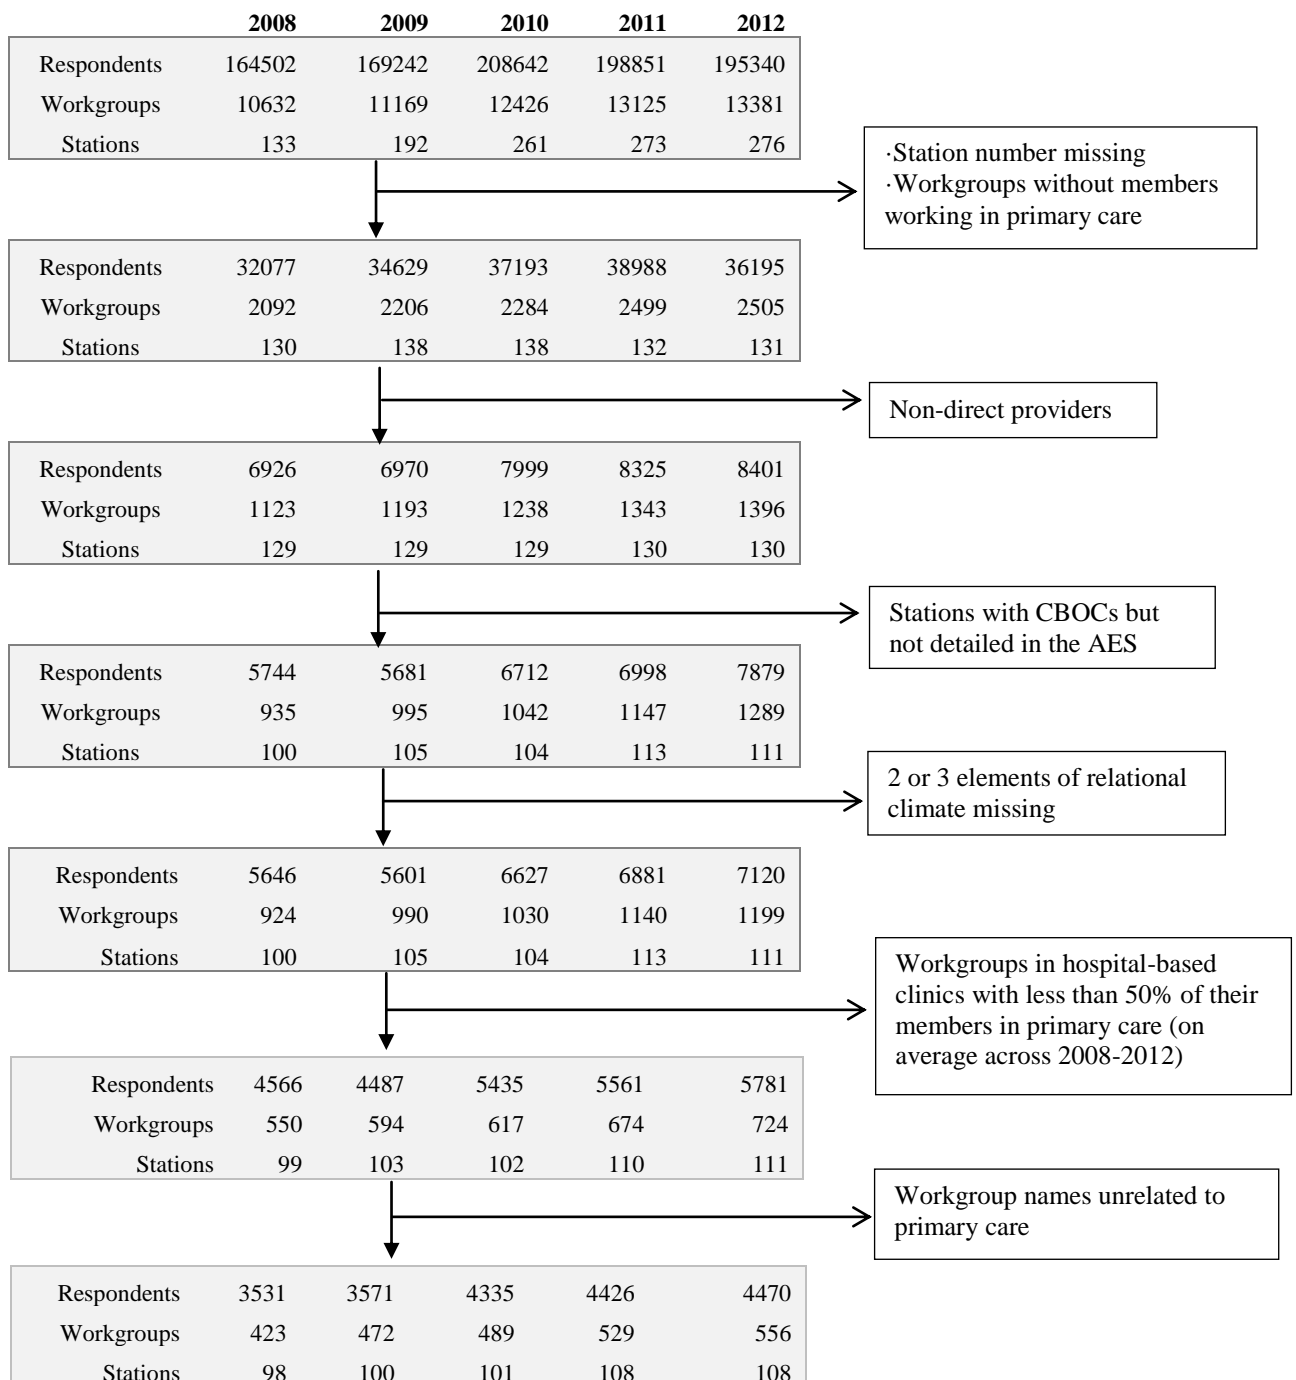

**Table A2: Occupational categories of interest based upon the All Employees Survey (AES)**

|                                               |                                                    |
|-----------------------------------------------|----------------------------------------------------|
| Clinical Nurse Specialist                     | Physician - Medicine including all sub-specialists |
| Educator/Learning Officer (for example Nurse) | Physician - Primary Care                           |
| LPN                                           | Physician - Psychiatrist                           |
| Nurse Practitioners                           | Physician - Surgeon including all sub-specialists  |
| Nursing Assistant                             | Physician Assistant                                |
| Optometrist                                   | Podiatrist                                         |
| Other certified or licensed hands-on direct   | Psychologist                                       |
| Other non-licensed hands-on direct patient    | RN - Level I                                       |
| Pharmacist                                    | RN - Level II                                      |
| Pharmacy Technician                           | RN - Level III                                     |
| Physical Medicine Therapist                   | RN - Level IV                                      |
| Physician - All other physicians              | RN - Level V                                       |
| Physician – Anesthesiologist                  | Social Worker                                      |

**Table A3: Conditions included in the Elixhauser Index**

|                                 |                                |
|---------------------------------|--------------------------------|
| Congestive heart failure        | Lymphoma                       |
| Cardiac arrhythmias             | Metastatic cancer              |
| Valvular disease                | Solid tumor without metastasis |
| Pulmonary circulation disorders | Rheumatoid arthritis           |
| Peripheral vascular disorders   | Coagulopathy                   |
| Hypertension                    | Obesity                        |
| Paralysis                       | Weight loss                    |
| Fluid and electrolyte disorders | Blood loss anemia              |
| Chronic pulmonary disease       | Deficiency anemias             |
| Diabetes uncomplicated          | Renal failure                  |
| Diabetes complicated            | Peptic ulcer                   |
| Liver disease                   | Hyperthyroidism                |
| AIDS                            | Renal failure                  |
| Alcohol abuse                   | Liver disease                  |
| Psychoses                       | Depression                     |

Source: Elixhauser, A., Steiner, C., Harris, D. R. & Coffey, R. M. Comorbidity Measures for Use with Administrative Data. *Medical Care* 36, (1998).

**Table A4: Conditions Included in the Registry Categories**

|                                       |                        |
|---------------------------------------|------------------------|
| Spinal cord injury                    | Alcohol dementia       |
| Chronically mentally ill              | Stroke                 |
| Blind rehab                           | Hepatitis C            |
| Post-traumatic Stress Disorder (PTSD) | Long-term care patient |
| Domiciliary patient                   | Home health            |
| AIDS                                  | Transplant             |
| End stage renal disease               |                        |

**Table A5: Patient, clinic and facility sample characteristics 2008-2012**

|                                                                    | <b>2008</b>         | <b>2009</b>         | <b>2010</b>         | <b>2011</b>         | <b>2012</b>         |
|--------------------------------------------------------------------|---------------------|---------------------|---------------------|---------------------|---------------------|
| <b>Patient</b>                                                     | 296,183             | 321,272             | 327,805             | 325,664             | 297,256             |
| Age                                                                | 67.42 (11.31)       | 66.40 (11.23)       | 65.51 (11.17)       | 64.59 (11.09)       | 63.82 (11.20)       |
| Gender (Male)                                                      | 96.60 (96.54-96.67) | 96.58 (96.52-96.65) | 96.44 (96.37-96.50) | 96.25 (96.19-96.32) | 96.07 (96.01-96.14) |
| Marital Status                                                     |                     |                     |                     |                     |                     |
| Single; Married; Separated, Divorced or Widowed; Unknown (Married) | 35.65 (35.47-35.82) | 35.42 (35.25-35.58) | 35.55 (35.38-35.71) | 36.01 (35.95-36.15) | 35.95 (35.80-36.05) |
| Priority status                                                    |                     |                     |                     |                     |                     |
| Group 1-Group 8 (Group 1)                                          | 35.02 (34.85-35.20) | 35.33 (35.16-35.49) | 35.36 (35.20-35.53) | 35.82 (35.66-35.99) | 35.7 (35.51-35.87)  |
| Elixhauser Index (0,1,2-4, +4)                                     |                     |                     |                     |                     |                     |
| 2-4 (both included)                                                | 80.89 (80.75-81.03) | 80.84 (80.70-80.97) | 80.69 (80.55-80.82) | 80.49 (80.35-80.62) | 80.02(79.87-80.16)  |
| Mental Health Diagnosis (Yes)                                      | 36.24 (36.07-36.41) | 37.06 (36.90-37.23) | 37.94 (37.78-38.11) | 38.95 (38.78-39.11) | 39.98 (39.81-40.16) |
| Insulin (Yes)                                                      | 62.06 (61.89-62.24) | 60.65 (60.48-60.82) | 59.14 (58.97-59.31) | 58.54 (58.37-58.71) | 57.22 (57.01-57.40) |
| % All tests and procedures (Yes)                                   | 51.62 (51.44-51.80) | 56.55 (56.38-56.72) | 56.78 (56.61-56.95) | 55.89 (55.70-55.99) | 55.54 (55.36-55.72) |
| Five or four vs. fewer than 4 (5 or 4)                             | 82.27 (82.14-82.41) | 84.61 (84.49-84.74) | 84.85 (84.73-84.97) | 84.70 (84.10-84.84) | 84.53 (84.40-84.66) |
| LDL-C                                                              | 92.49 (34.88)       | 91.89 (34.78)       | 91.88 (34.85)       | 89.97 (34.83)       | 90.29 (35.28)       |
| Blood Pressure                                                     |                     |                     |                     |                     |                     |
| Systolic                                                           | 133.29 (19.74)      | 133.38 (19.55)      | 133.28 (19.38)      | 133.33 (19.47)      | 133.66 (19.68)      |
| Diastolic                                                          | 74.37 (12.53)       | 74.70 (12.54)       | 74.85 (12.46)       | 75.06 (12.45)       | 75.24 (12.50)       |
| HbA1c                                                              | 7.37 (1.75)         | 7.36 (1.68)         | 7.39 (1.65)         | 7.47 (1.73)         | 7.50 (1.75)         |
| <b>Clinic</b>                                                      | 189                 | 204                 | 212                 | 231                 | 242                 |
| CBOCs                                                              |                     |                     |                     |                     |                     |
| Relational Climate                                                 | 10.93 (1.28)        | 11.16 (1.13)        | 11.51 (1.25)        | 11.75 (1.08)        | 10.83 (1.34)        |
| <b>Parent facility</b>                                             | 98                  | 100                 | 101                 | 108                 | 108                 |
| Funding available (% change 2012-2011)                             | 2.06 (4.03)         | 2.01 (3.98)         | 2.14 (4.01)         | 2.55 (6.91)         | 2.94 (7.73)         |
| Beds available                                                     | 362.64 (221.87)     | 366.88 (226.62)     | 350.18 (224.07)     | 348.49 (219.52)     | 346.21 (219.19)     |
| Teaching status (resident/beds)                                    | 0.03 (0.08)         | 0.025 (0.072)       | 0.022 (0.06)        | 0.014 (0.04)        | 0.013 (0.04)        |
| Resignation rate (% resignations per average onboard employee)     | 6.80 (0.02)         | 5.67 (0.02)         | 6.36 (0.02)         | 4.78 (0.02)         | 6.49 (0.02)         |

|                                   |                   |                   |                   |                   |                   |
|-----------------------------------|-------------------|-------------------|-------------------|-------------------|-------------------|
| Full time equivalent employees    | 2388.85 (1310.28) | 2571.42 (1388.54) | 2537.11 (1363.95) | 2597.02 (1364.98) | 2611.66 (1356.28) |
| Diabetes prevalence (state level) | 8.84 (1.11)       | 9.18 (1.26)       | 9.35 (1.21)       | 9.56 (1.33)       | 9.74 (1.46)       |

---

Notes: Mean for continuous variables (SD); percentage for categorical variables (95% CI)

**Table A6: Observed versus predicted likelihood of guideline compliance by decile**

| Group | Total | Q_ALLNONE = 1 |          | Q_ALLNONE = 0 |          |
|-------|-------|---------------|----------|---------------|----------|
|       |       | Observed      | Expected | Observed      | Expected |
| 1     | 92366 | 24671         | 24481.81 | 67695         | 67884.19 |
| 2     | 92367 | 37464         | 37067.71 | 54903         | 55299.29 |
| 3     | 92371 | 43548         | 43588.26 | 48823         | 48782.74 |
| 4     | 92364 | 48432         | 48610.18 | 43932         | 43753.82 |
| 5     | 92365 | 52339         | 52844.19 | 40026         | 39520.81 |
| 6     | 92367 | 56701         | 56748.17 | 35666         | 35618.83 |
| 7     | 92366 | 60518         | 60696.74 | 31848         | 31669.26 |
| 8     | 92367 | 65052         | 64759.13 | 27315         | 27607.87 |
| 9     | 92372 | 69297         | 69356.20 | 23075         | 23015.80 |
| 10    | 92348 | 75923         | 75792.47 | 16425         | 16555.53 |

**Figure A3: Distribution of the Intermediate Outcome Indicators: LDL-C, diastolic and systolic blood pressure and glycated hemoglobin.**

A) LDL-C -Cholesterol

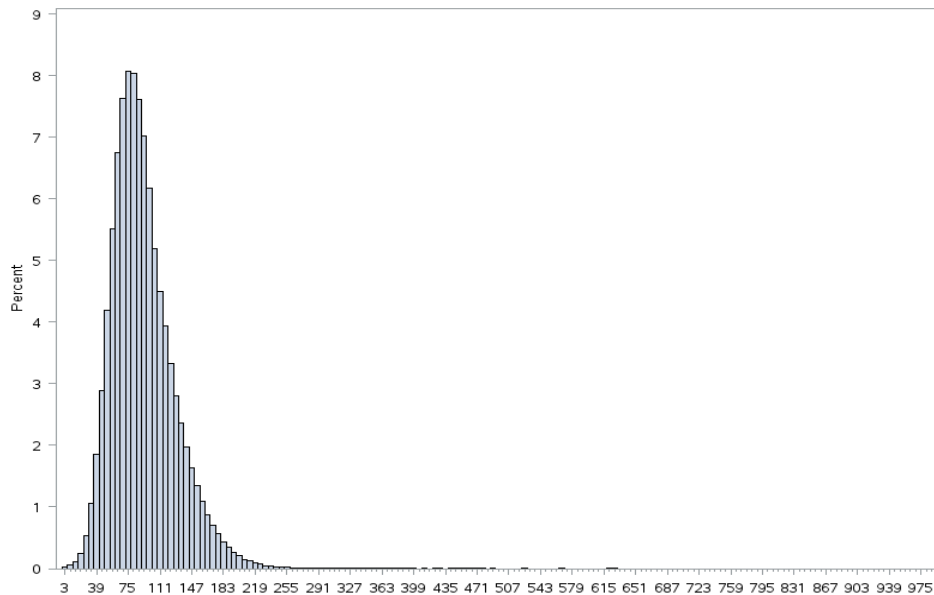

|          |       |
|----------|-------|
| Mean     | 91.30 |
| Median   | 86    |
| Mode     | 76    |
| Skewness | 1.05  |
| Kurtosis | 3.54  |

B) Blood Pressure, systolic and diastolic

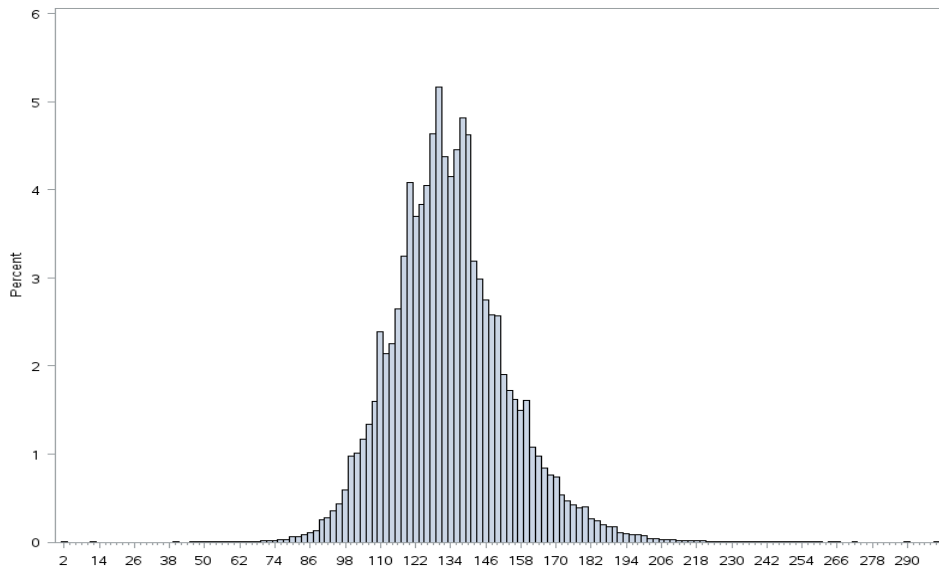

|          |        |
|----------|--------|
| Mean     | 133.38 |
| Median   | 132    |
| Mode     | 130    |
| Skewness | 0.50   |
| Kurtosis | 1.03   |

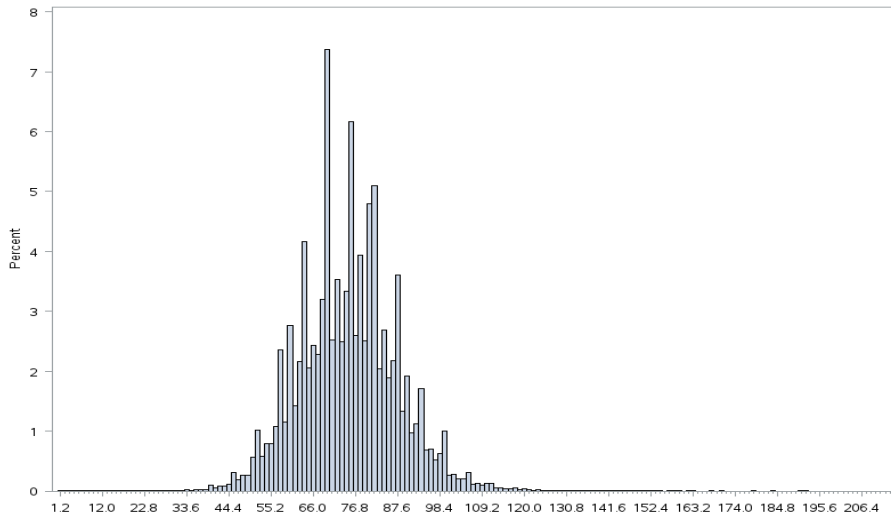

|          |       |
|----------|-------|
| Mean     | 74.85 |
| Median   | 75    |
| Mode     | 70    |
| Skewness | 0.22  |
| Kurtosis | 0.77  |

### C) Glycated hemoglobin

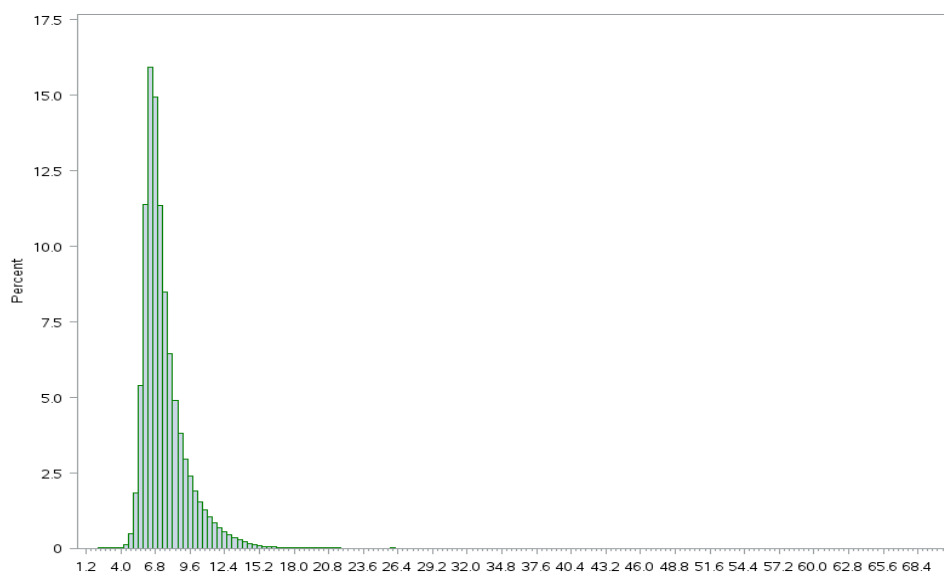

|          |      |
|----------|------|
| Mean     | 7.42 |
| Median   | 6.9  |
| Mode     | 6.5  |
| Skewness | 1.77 |
| Kurtosis | 5.79 |
